# Supplementary material
Source: PubMed Central journal article supplement (PMC3196630)
Supplement: NIHMS248243-supplement-Supplementary_Data.pdf [file NIHMS248243-supplement-Supplementary_Data.pdf]

## SUPPLEMENTARY INFORMATION

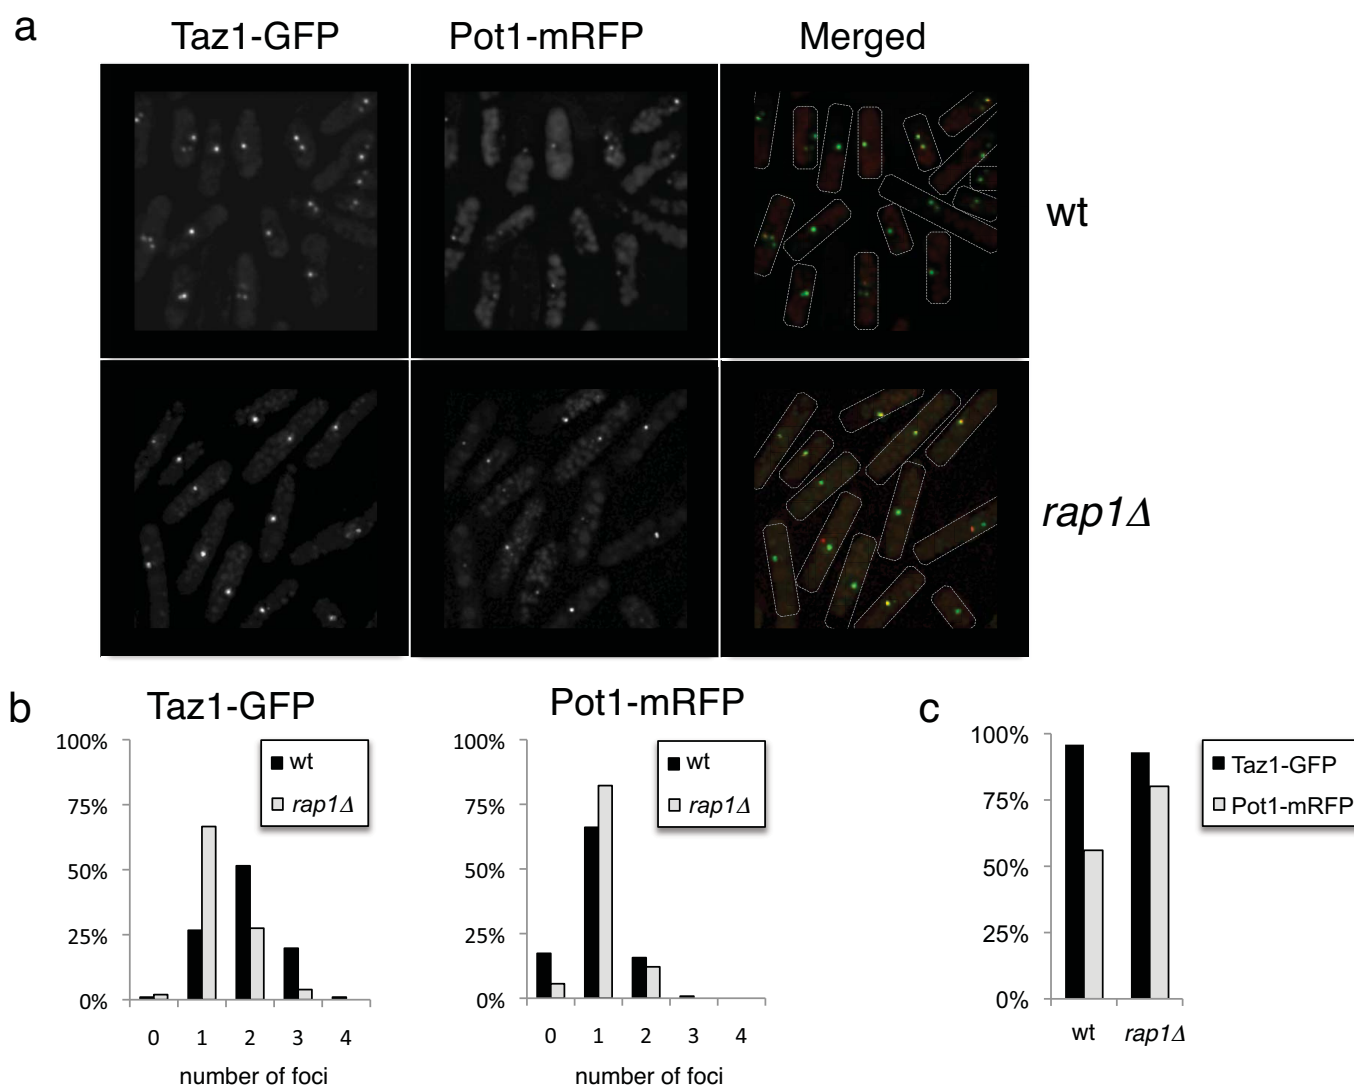

**Supplementary Figure S1 – Validation of Pot1-mRFP as a marker of wt and *rap1Δ* dysfunctional telomeres.** (a) Images showing Taz1-GFP and Pot1-mRFP localization in wt and *rap1Δ* cells. (b) Distribution of Taz1-GFP and Pot1-mRFP foci per cell. In wt cells, Taz1-GFP foci appear in a distribution of 1-3 foci per cells. In contrast, telomeres appear to coalesce in *rap1Δ* cells since most cells possess either 1 or 2 Taz1-GFP foci. Both wt and *rap1Δ* cells exhibit 1 or 2 Pot1-mRFP foci per cell. (c) Quantification of cells exhibiting Taz1-GFP and Pot1-mRFP foci. Whereas Taz1-GFP foci are visible in the majority of cells, Pot1-mRFP is only detected in 56% of wt cells. However, Pot1-mRFP foci are visible in 80% of *rap1Δ* cells. As all Pot1-mRFP colocalize with Taz1-GFP in *rap1Δ* cells, Pot1-mRFP presents as a good telomeric marker in cells with dysfunctional telomeres.

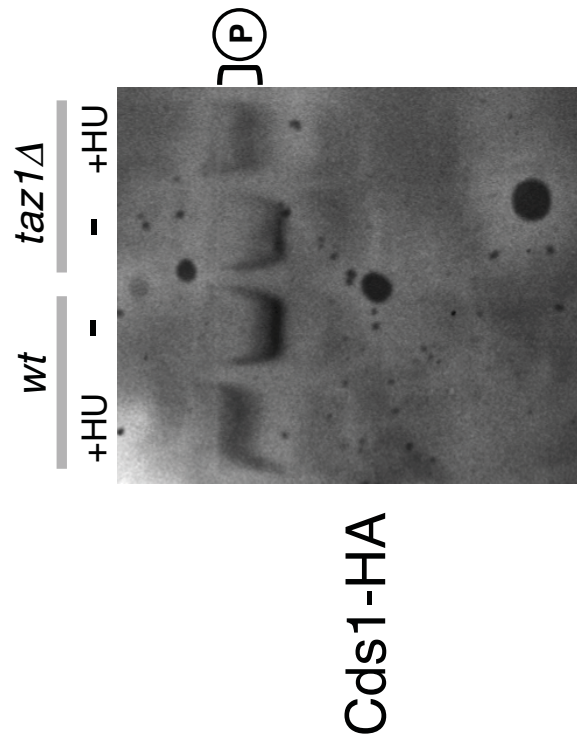

**Supplementary Figure S2 – Replication checkpoints are inactive in *taz1Δ* cells.**

Immunoblot analysis of Cds1-HA using Phos-tag<sup>TM</sup> polyacrylamide gels. Extracts derived from wt and *taz1Δ* cells exhibit hyperphosphorylation of Cds1 upon incubation with 20mM HU. Similar to wt cells, untreated *taz1Δ* cells lack Cds1 hyperphosphorylation.

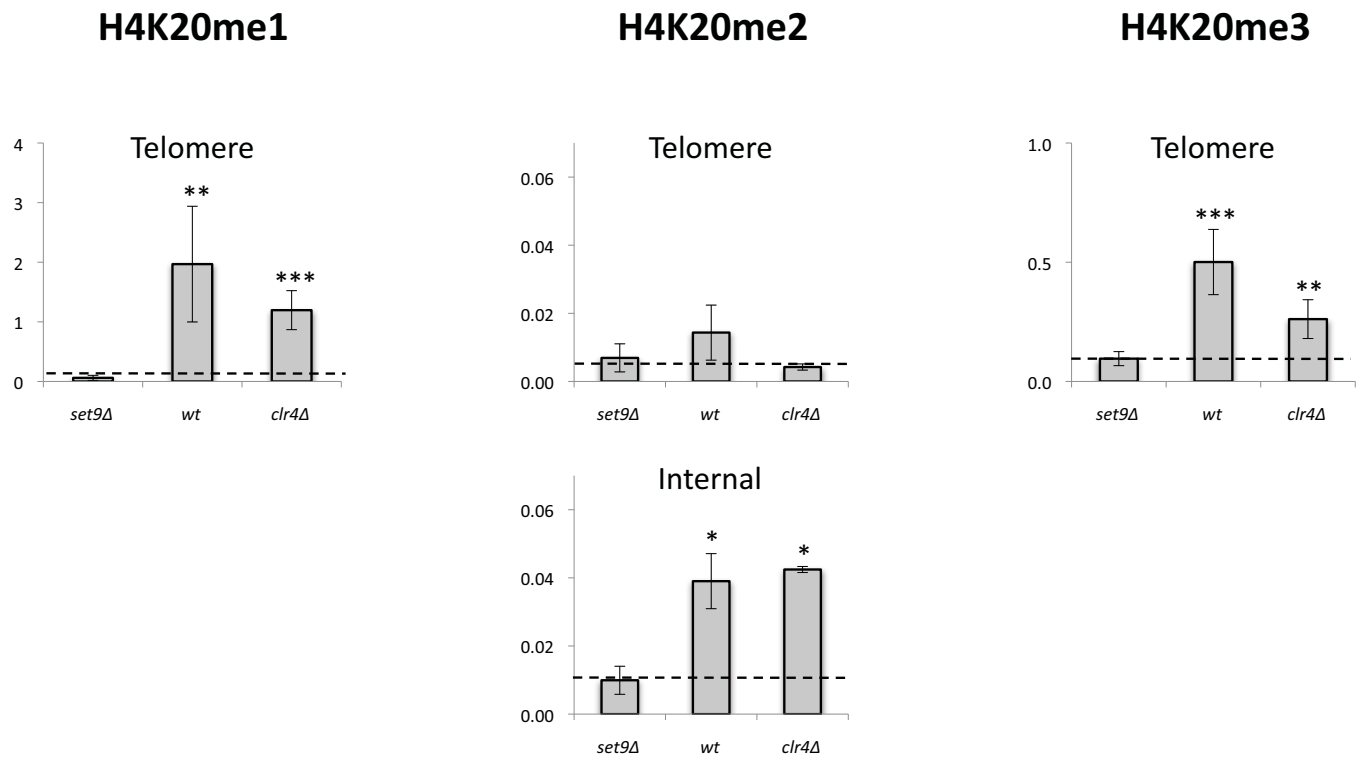

**Supplementary Figure S3 – Clr4-dependent heterochromatin is not responsible for H4K20me2 telomere exclusion.** Telomeres are rich in H4K20me1 and H4K20me3 but lack H4K20me2 modifications, in contrast to internal chromosomal loci. Absence of Clr4 methyltransferase (*clr4Δ*) does not greatly affect H4K20 methylation pattern at telomeres, although a reduction in H4K20me3 modification can be observed. Cells lacking Set9/Kmt5 methylase (*set9Δ*) were used as control. qPCR based ChIP analysis of H4K20me1, H4K20me2 and H4K20me3 at telomeres (Telomere) and *ade6<sup>+</sup>* locus (Internal) on the indicated strains shown as percentage precipitated DNA. Error bars, s.d.; n≥3; \* p<0.05, \*\* p<0.01 and \*\*\* p<0.001 based on a two-tailed Student's t-test to controls.

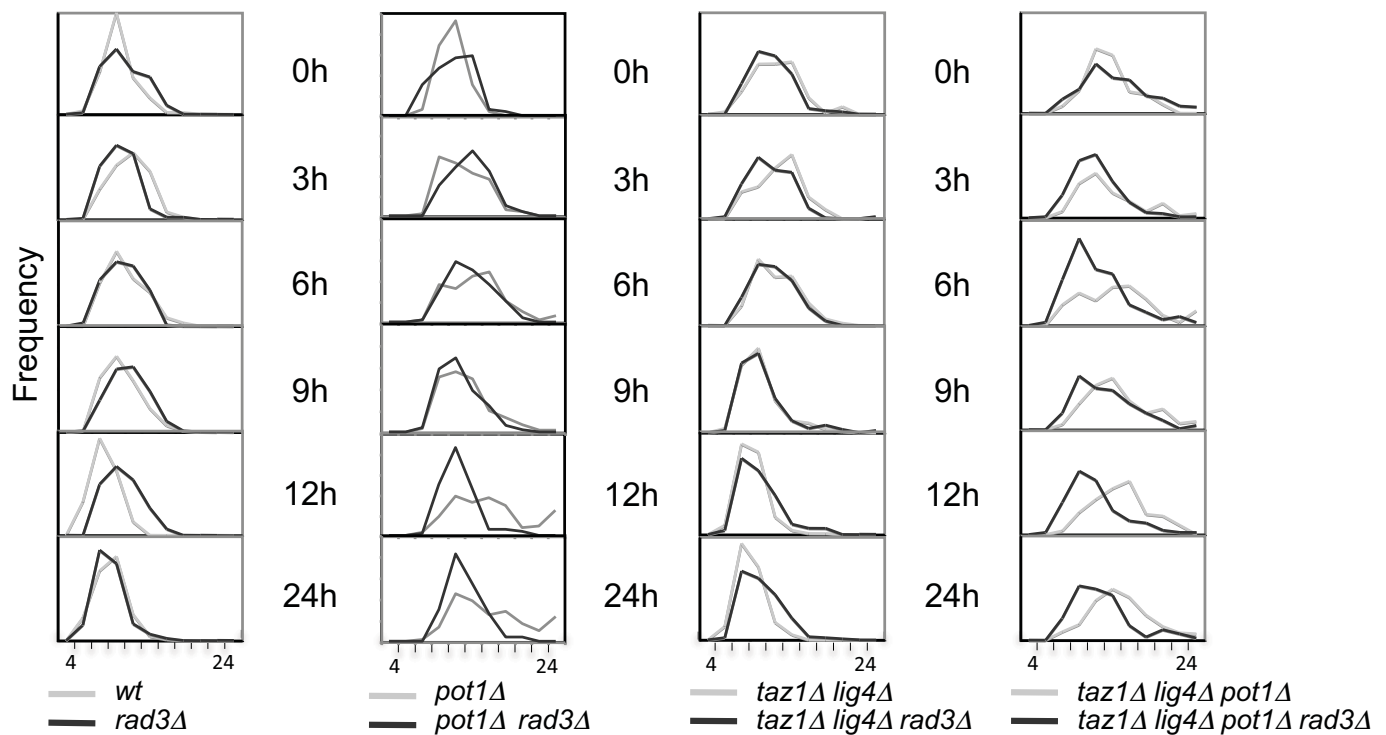

#### Supplementary Figure S4 – Pot1 prevents Rad3/ATR checkpoints at telomeres.

Delay in cell cycle progression activated by depleting Pot1 is dependent on *rad3*<sup>+</sup>.

Histograms depicting the distribution of cell sizes in  $\mu\text{m}$  at different time points in haploid cells of the indicated genotype. Meiosis was induced in *rad3*<sup>+/Δ</sup>; *pot1*<sup>+/Δ</sup>*rad3*<sup>+/Δ</sup>; *taz1*<sup>Δ/Δ</sup>*lig4*<sup>Δ/Δ</sup>*rad3*<sup>+/Δ</sup> and *taz1*<sup>Δ/Δ</sup>*lig4*<sup>Δ/Δ</sup>*pot1*<sup>+/Δ</sup>*rad3*<sup>+/Δ</sup> diploids and the resulting spores were allowed to germinate in rich media for 7h. Subsequently, the resulting haploid cells were incubated in selective media for the desired genotype and samples were taken at different time points.

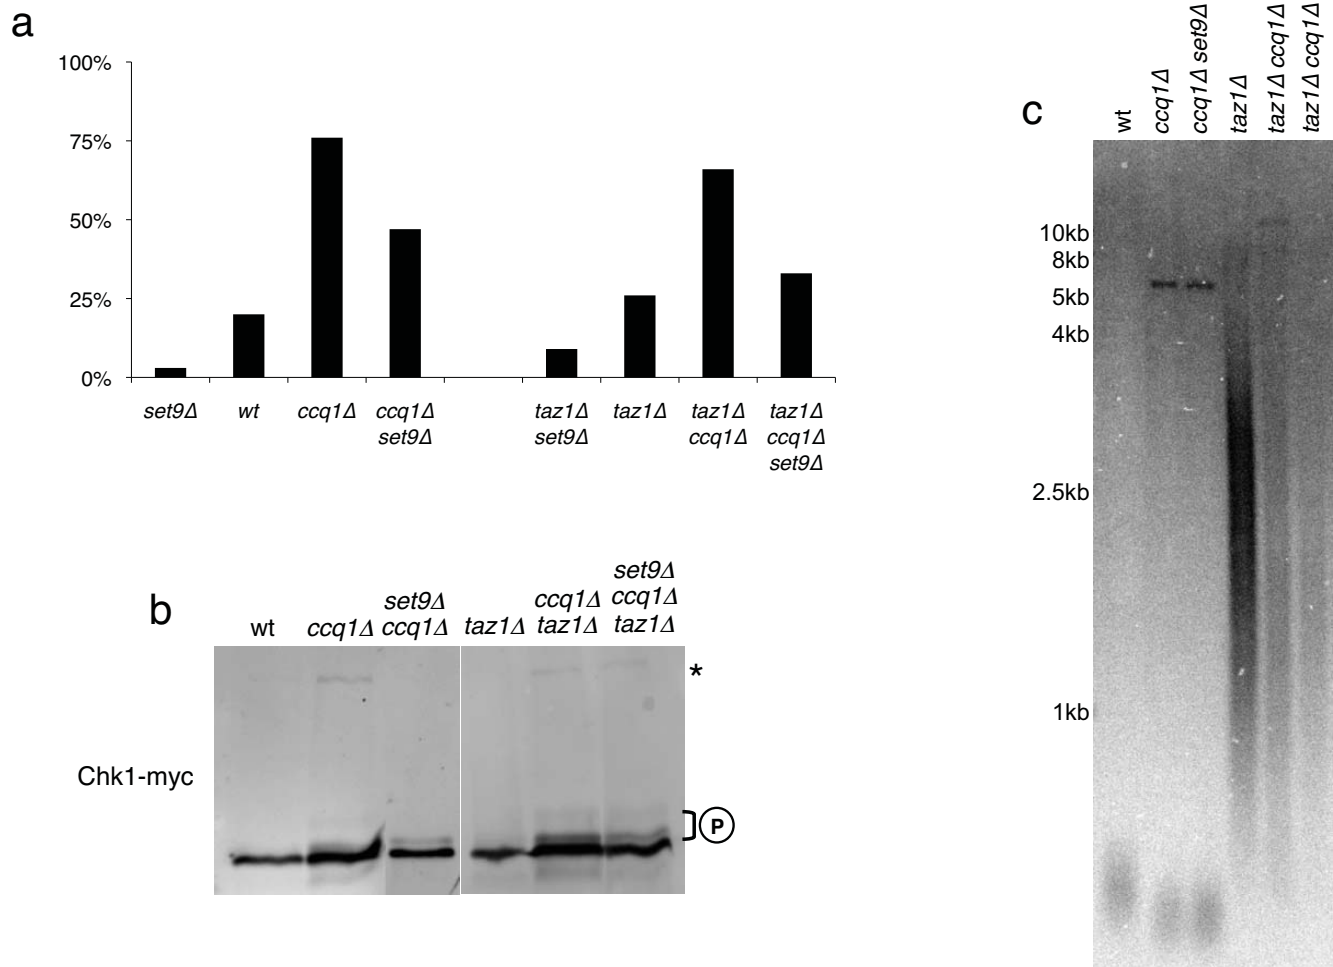

**Supplementary Figure S5 – Preventing H4K20 methylation in *ccq1Δ* cells partially rescues telomere deprotection.** In *ccq1Δ* and *ccq1Δ taz1Δ* cells, a reduction in the number of YFP-Crb2 foci is observed upon deletion of Set9. (a) Quantification of the number of YFP foci in cells expressing YFP-Crb2 from a pREP81 multicopy plasmid. (b) Immunoblot analysis of Chk1-myc in *ccq1Δ* and *ccq1Δ taz1Δ* cells upon deletion of Set9 (c) Telomere length analysis by southern blotting using a telomere probe in the indicated strains.

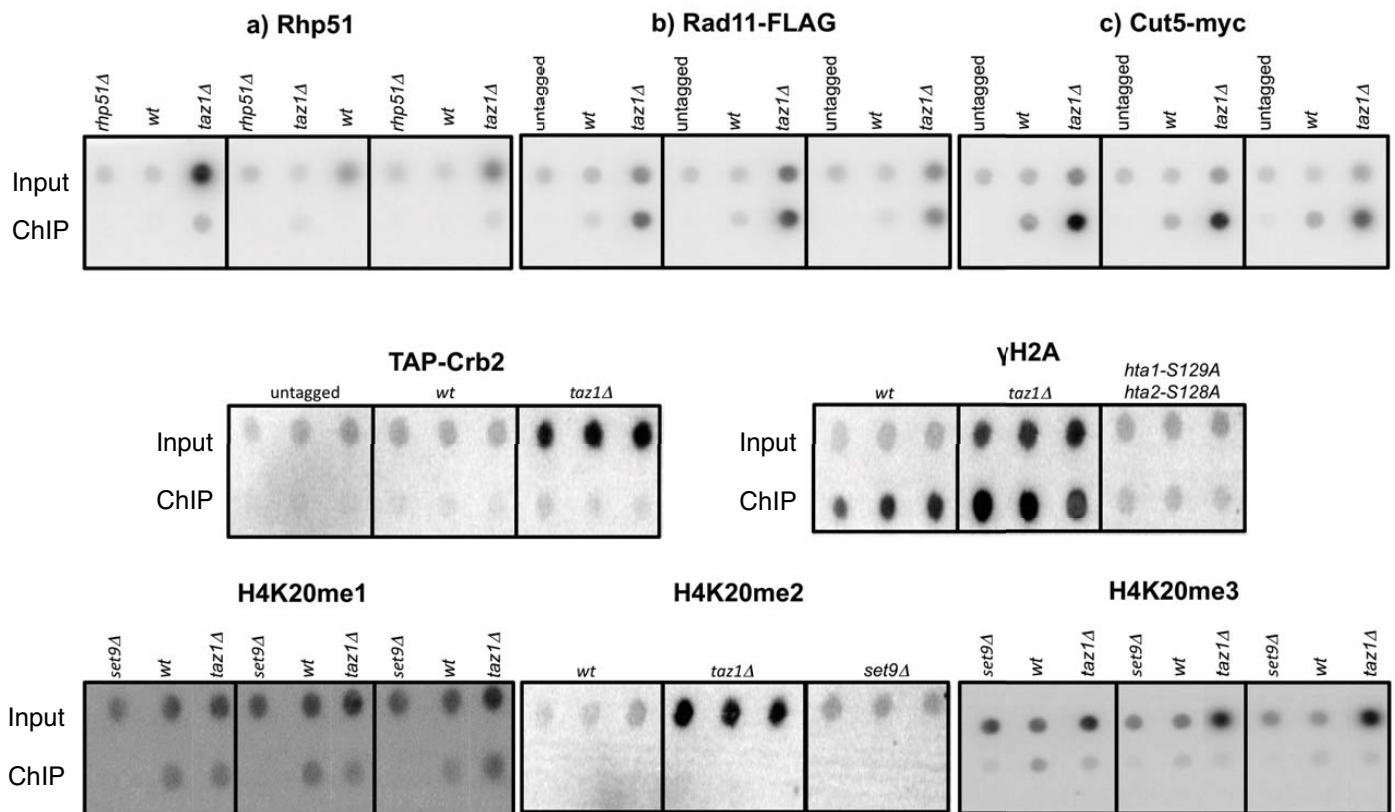

**Supplementary Figure S6 – Telomeric dot-blots used for ChIP quantification.** Upper rows depict input samples whereas lower rows represent ChIP samples for three independent experiments. Input samples exhibit 40% of total DNA.

Supplementary Table 1. Strains used in this study.

| Strain | Genotype                                                                                                                                                                 | Creator    |
|--------|--------------------------------------------------------------------------------------------------------------------------------------------------------------------------|------------|
| MGF10  | <i>h- ade6-M210 his3-D1 leu1-32 ura4-D18</i>                                                                                                                             | J Cooper   |
| MGF11  | <i>h+ ade6-M216 his3-D1 leu1-32 ura4-D18</i>                                                                                                                             | J Cooper   |
| MGF21  | <i>h+ taz1::KanMX6</i>                                                                                                                                                   | J Cooper   |
| MGF224 | <i>h- ade6-M216 leu1-32 ura4-D18 pot1::pot1-mRFP-KanMX6 rad11::rad11-GFP-KanMX6</i>                                                                                      | This study |
| MGF225 | <i>h- ade6-M210 leu1-32 ura4-D18 pot1::pot1-mRFP-KanMX6 rad11::rad11-GFP-KanMX6 taz1::ura4<sup>+</sup></i>                                                               | This study |
| MGF226 | <i>h+ ade6-M210 leu1-32 ura4-D18 pot1::pot1-mRFP-KanMX6 rad22::rad22-GFP-KanMX6</i>                                                                                      | This study |
| MGF228 | <i>h+ leu1-32 ura4-D18 rad26::rad26-GFP-KanMX6</i>                                                                                                                       | T Wolkow   |
| MGF232 | <i>h+ ade6-M216 ura4-D18 pot1::pot1-mRFP-KanMX6 rad26::rad26-GFP-KanMX6</i>                                                                                              | This study |
| MGF233 | <i>h+ ade6-M216 leu1-32 ura4-D18 pot1::pot1-mRFP-KanMX6 rad26::rad26-GFP-KanMX6 taz1::ura4<sup>+</sup></i>                                                               | This study |
| MGF298 | <i>h+ ade6-M210 leu1-32 ura4-D18 his3-D3 rad26::rad26-3HA</i>                                                                                                            | AM Carr    |
| MGF304 | <i>h-/h+ ade6-M210/ade6-M216 his3-D1/his3-D1 leu1-32/leu1-32 ura4-D18/ura4-D18</i>                                                                                       | J Cooper   |
| MGF309 | <i>h-/h+ ade6-M210/ade6-M216 leu1-32/leu1-32 ura4-D18/ura4-D18 lig4::KanMX6/lig4::KanMX6 taz1::ura4<sup>+</sup>/taz1::ura4<sup>+</sup></i>                               | J Cooper   |
| MGF318 | <i>h- rad4::rad4-GFP-ura4<sup>+</sup></i>                                                                                                                                | AM Carr    |
| MGF320 | <i>h- leu1-32::2xYFP-crb2-leu1<sup>+</sup> ura4-D18 crb2-D2::ura4<sup>+</sup></i>                                                                                        | P Russell  |
| MGF320 | <i>h- leu1-32::2xYFP-crb2-leu1<sup>+</sup> ura4-D18 crb2-D2::ura4<sup>+</sup></i>                                                                                        | P Russell  |
| MGF321 | <i>h- ade6-M210 leu1-32 ura4-D18 rad9::Rad9-YFP-ura4<sup>+</sup></i>                                                                                                     | AM Carr    |
| MGF346 | <i>h- ade6-M210 his3-D1 leu1-32 ura4-D18 cds1::cds1-3HA-KanMX6</i>                                                                                                       | This study |
| MGF347 | <i>h- ade6-M210 his3-D1 ura4-D18 taz1::ura4 cds1::cds1-3HA-KanMX6</i>                                                                                                    | This study |
| MGF348 | <i>h- ade6-M210 his3-D1 leu1-32 ura4-D18 chk1::chk1-13myc-KanMX6</i>                                                                                                     | This study |
| MGF381 | <i>h-/h+ ade6-M210/ade6-M216 leu1-32/leu1-32 ura4-D18/ura4-D18 lig4::KanMX6/lig4::KanMX6 taz1::ura4<sup>+</sup>/taz1::ura4<sup>+</sup> pot1<sup>+</sup>/pot1::hphMX6</i> | This study |
| MGF424 | <i>h- ade6-M210 his3-D1 leu1-32 ura4-D18 chk1::chk1-13myc-KanMX6 taz1::ura4<sup>+</sup></i>                                                                              | This study |
| MGF449 | <i>h-/h+ ade6-M210/ade6-M216 his3-D1/his3-D1 leu1-32/ leu1-32 ura4-D18/ura4-D18 pot1<sup>+</sup>/pot1::ura4<sup>+</sup></i>                                              | This study |
| MGF643 | <i>h- ade6-M210 ura4-D18 leu1-32::2xYFP-crb2-leu1<sup>+</sup> crb2-D2::ura4<sup>+</sup> pot1::pot1-mRFP-KanMX6</i>                                                       | This study |
| MGF645 | <i>h- ade6-M210 ura4-D18 leu1-32::2xYFP-crb2-leu1<sup>+</sup> crb2-D2::ura4<sup>+</sup> pot1::pot1-mRFP-KanMX6 taz1::Kan-MX6</i>                                         | This study |
| MGF646 | <i>h+ ade6-M210 ura4-D18 rad4::rad4-GFP-ura4<sup>+</sup> pot1::pot1-mRFP-KanMX6</i>                                                                                      | This study |
| MGF647 | <i>h- ade6-M210 ura4-D18 rad4::rad4-GFP-ura4<sup>+</sup> pot1::pot1-mRFP-KanMX6 taz1::ura4<sup>+</sup></i>                                                               | This study |
| MGF649 | <i>h- leu1-32::2xYFP-crb2-leu1<sup>+</sup> ura4-D18 crb2-D2::ura4<sup>+</sup> taz1::KanMX6</i>                                                                           | This study |
| MGF674 | <i>h+ ade6-M216 leu1-32 ura4-D18 rad9::rad9-YFP-ura4<sup>+</sup> pot1::pot1-mRFP-KanMX6 taz1::KanMX6</i>                                                                 | This study |
| MGF675 | <i>h+ ade6-M216 leu1-32 ura4-D18 rad9::rad9-YFP-ura4<sup>+</sup> pot1::pot1-mRFP-KanMX6</i>                                                                              | This study |
| MGF726 | <i>h- ade6-M210 leu1-32 ura4-D18 his3-D1 rad3::natMX6</i>                                                                                                                | This study |
| MGF728 | <i>h+ ade6-M216 leu1-32 ura4-D18 taz1::taz1-GFP-KanMX6 pot1-mRFP-KanMX6</i>                                                                                              | This study |
| MGF801 | <i>h-/h+ ade6-M216/ade6-M210 his3-D1/his3-D1 ura4-D18/ura4-D18 leu1-</i>                                                                                                 | This study |

|         |                                                                                                                                                                                                                                                                                  |            |
|---------|----------------------------------------------------------------------------------------------------------------------------------------------------------------------------------------------------------------------------------------------------------------------------------|------------|
|         | <i>32::2YFP-crb2-leu1<sup>+</sup>/leu1-32::2YFP-crb2-leu1<sup>+</sup> crb2-D2::ura4<sup>+</sup>/crb2-D2::ura4<sup>+</sup> taz1::KanMX6/taz1::kanMX6 lig4::kanMX6/lig4::KanMX6</i>                                                                                                |            |
| MGF802  | <i>h-/h- ade6-M216/ade6-M210 his3-D1/his3-D1 ura4-D18/ura4-D18 leu1-32::2YFP-crb2-leu1<sup>+</sup>/leu1-32::2YFP-crb2-leu1<sup>+</sup> crb2-D2::ura4<sup>+</sup>/crb2-D2::ura4<sup>+</sup> taz1::KanMX6/taz1::kanMX6 lig4::kanMX6/lig4::KanMX6 pot1<sup>+</sup>/pot1::hphMX6</i> | This study |
| MGF804  | <i>h-/h+ ade6-M210/ade6-M216 his3-D1/his3-D1 leu1-32/leu1-32 ura4-D18/ura4-D18 taz1::KanMX6/taz1::KanMX6</i>                                                                                                                                                                     | This study |
| MGF821  | <i>h- ade6-M210 leu1-32 ura4-D18 his3-D1 rad3::natMX6 taz1::KanMX6</i>                                                                                                                                                                                                           | This study |
| MGF873  | <i>h- ade6-M210 his3-D1 leu1-32 ura4-D18 chk1::chk1-13myc-KanMX6 + pJR81XL(LEU2)</i>                                                                                                                                                                                             | This study |
| MGF876  | <i>h- ade6-M210 his3-D1 leu1-32 ura4-D18 taz1::ura4<sup>+</sup> chk1::chk1-13myc-KanMX6 + pJR81XL(LEU2)</i>                                                                                                                                                                      | This study |
| MGF882  | <i>h- ade6-M210 his3-D1 leu1-32 ura4-D18 chk1::chk1-13myc-KanMX6 + pJR81XL-myb-2YFP-crb2(LEU2)</i>                                                                                                                                                                               | This study |
| MGF885  | <i>h- ade6-M210 his3-D1 leu1-32 ura4-D18 taz1::ura4<sup>+</sup> chk1::chk1-13myc-KanMX6 + pJR81XL-myb-2YFP-crb2(LEU2)</i>                                                                                                                                                        | This study |
| MGF888  | <i>h+ ade6-M210 leu1-32 ura4-D18 pot1::pot1-mRFP-KanMX6 + pJR81XL-myb-2YFP-crb2(LEU2)</i>                                                                                                                                                                                        | This study |
| MGF894  | <i>h+ ade6-M216 leu1-32 ura4-D18 pot1::pot1-mRFP-KanMX6 taz1::ura4<sup>+</sup> + pJR81XL-myb-2YFP-crb2(LEU2)</i>                                                                                                                                                                 | This study |
| MGF927  | <i>h+ ade6-M216 leu1-32 ura4-D18 taz1::taz1-GFP-KanMX6 pot1::pot1-mRFP-KanMX6 rap1::hphMX6</i>                                                                                                                                                                                   | This study |
| MGF977  | <i>h- ade6-M210 leu1-32 ura4-D18 his3-D1 rad3::natMX6 taz1::KanMX6 + pJR81XL(LEU2)</i>                                                                                                                                                                                           | This study |
| MGF978  | <i>h- ade6-M210 leu1-32 ura4-D18 his3-D1 rad3::natMX6 taz1::KanMX6 + pJR41XL-myb-2YFP-Crb2(LEU2)</i>                                                                                                                                                                             | This study |
| MGF998  | <i>h- ade6-M210 his3-D1 leu1-32 ura4-D18 rad9::rad9-3HA-hphMX6</i>                                                                                                                                                                                                               | This study |
| MGF999  | <i>h+ taz1::kanMX6 rad9::rad9-3HA-hphMX6</i>                                                                                                                                                                                                                                     | This study |
| MGF1000 | <i>h-/h+ ade6-M210/ade6-M216 his3-D1/his3-D1 leu1-32/leu1-32 ura4-D18/ura4-D18 chk1::chk1-13myc-natMX6/chk1<sup>+</sup></i>                                                                                                                                                      | This study |
| MGF1001 | <i>h-/h+ ade6-M210/ade6-M216 leu1-32/leu1-32 ura4-D18/ura4-D18 lig4::KanMX6/lig4::KanMX6 taz1::ura4<sup>+</sup>/taz1::ura4<sup>+</sup> chk1::chk1-13myc-natMX6/chk1<sup>+</sup></i>                                                                                              | This study |
| MGF1002 | <i>h-/h+ ade6-M210/ade6-M216 leu1-32/leu1-32 ura4-D18/ura4-D18 lig4::KanMX6/lig4::KanMX6 taz1::ura4<sup>+</sup>/taz1::ura4<sup>+</sup> pot1::hphMX6/pot1<sup>+</sup> chk1::chk1-13myc-natMX6/chk1<sup>+</sup></i>                                                                | This study |
| MGF1003 | <i>h-/h+ ade6-M210/ade6-M216 his3-D1/his3-D1 leu1-32/leu1-32 ura4-D18/ura4-D18 chk1::chk1-13myc-natMX6/chk1<sup>+</sup> pot1::ura4<sup>+</sup>/pot1<sup>+</sup></i>                                                                                                              | This study |
| MGF1004 | <i>h-/h+ ade6-M210/ade6-M216 his3-D1/his3-D1 leu1-32/leu1-32 ura4-D18/ura4-D18 rad3::natMX6/rad3<sup>+</sup></i>                                                                                                                                                                 | This study |
| MGF1005 | <i>h-/h+ ade6-M210/ade6-M216 leu1-32/leu1-32 ura4-D18/ura4-D18 lig4::KanMX6/lig4::KanMX6 taz1::ura4<sup>+</sup>/taz1::ura4<sup>+</sup> rad3::natMX6/rad3<sup>+</sup></i>                                                                                                         | This study |
| MGF1030 | <i>h- ade6-M210 leu1-32 ura4-D18 his3-D1 rad3::natMX6 taz1::KanMX6 chk1::chk1-13myc-hphMX6 + pJR81XL(LEU2)</i>                                                                                                                                                                   | This study |
| MGF1031 | <i>h- ade6-M210 leu1-32 ura4-D18 his3-D1 rad3::natMX6 taz1::KanMX6 chk1::chk1-13myc-hphMX6 taz1::KanR + pJR81XL-myb-2YFP-crb2(LEU2)</i>                                                                                                                                          | This study |
| MGF1044 | <i>h+ ade6-M210 leu1-32 ura4-D18 his3-D3 rad26::rad26-3HA taz1::kanMX6</i>                                                                                                                                                                                                       | This study |
| MGF1045 | <i>h-/h+ ade6-M210/ade6-M216 leu1-32/leu1-32 ura4-D18/ura4-D18 lig4::KanMX6/lig4::KanMX6 taz1::ura4<sup>+</sup>/taz1::ura4<sup>+</sup> pot1::hphMX6/pot1<sup>+</sup> rad3::natMX6/rad3<sup>+</sup></i>                                                                           | This study |
| MGF1046 | <i>h-/h+ ade6-M210/ade6-M216 his3-D1/his3-D1 leu1-32/leu1-32 ura4-D18/ura4-D18 pot1::ura4<sup>+</sup>/pot1<sup>+</sup> rad3::natMX6/rad3<sup>+</sup></i>                                                                                                                         | This study |
| MGF1054 | <i>h-/h+ ade6-M210/ade6-M216 taz1::ura4<sup>+</sup>/taz1<sup>+</sup></i>                                                                                                                                                                                                         | J Cooper   |
| MGF1055 | <i>h+ ade6-M216 his3-D1 leu1-32 ura4-D18 pot1::pot1-mRFP-KanMX6</i>                                                                                                                                                                                                              | This study |



|         |                                                                                                                                       |             |
|---------|---------------------------------------------------------------------------------------------------------------------------------------|-------------|
|         | <i>rad22::rad22-GFP-KanMX6 taz1::ura4<sup>+</sup></i>                                                                                 |             |
| MGF1263 | <i>h- ade6-M210 his3-D1 leu1-32 ura4-D18 chk1::chk1-13myc-KanMX6 ccq1::hphMX6</i>                                                     | This Study  |
| MGF1264 | <i>h- ade6-M210 his3-D1 leu1-32 ura4-D18 chk1::chk1-13myc-KanMX6 trt1::hphMX6</i>                                                     | This Study  |
| MGF1265 | <i>h- ade6-M210 his3-D1 leu1-32 ura4-D18 chk1::chk1-13myc-KanMX6 taz1::ura4<sup>+</sup> ccq1::hphMX6</i>                              | This Study  |
| MGF1344 | <i>h- ade6-M210 his3-D1 leu1-32 ura4-D18 chk1::chk1-13myc-KanMX6 + pJR81XL-2YFP-crb2(LEU2)</i>                                        | This Study  |
| MGF1345 | <i>h- ade6-M210 his3-D1 leu1-32 ura4-D18 chk1::chk1-13myc-KanMX6 taz1::ura4<sup>+</sup> + pJR81XL-2YFP-crb2(LEU2)</i>                 | This Study  |
| MGF1366 | <i>h- ade6-M210 his3-D1 leu1-32 ura4-D18 chk1::chk1-13myc-KanMX6 ccq1::hphMX6 + pJR81XL-2YFP-crb2(LEU2)</i>                           | This Study  |
| MGF1369 | <i>h- ade6-M210 his3-D1 leu1-32 ura4-D18 chk1::chk1-13myc-KanMX6 taz1::ura4<sup>+</sup> ccq1::hphMX6 + pJR81XL-2YFP-crb2(LEU2)</i>    | This Study  |
| MGF1371 | <i>ade6-M210 leu1-32 his3-D1 ura4-D18 taz1::ura4<sup>+</sup> trt1::his3<sup>+</sup> chk1::chk1-13myc-KanMX6</i>                       | This Study  |
| MGF1422 | <i>h- his3-D1 leu1-32 ura4-D18 set9::KanMX6 chk1::chk1-13myc-hphMX6 ccq1::natMX6</i>                                                  | This Study  |
| MGF1424 | <i>h- his3-D1 leu1-32 ura4-D18 set9::KanMX6 taz1::ura4<sup>+</sup> chk1::chk1-13myc-hphMX6 ccq1::natMX6</i>                           | This Study  |
| MGF1430 | <i>h- his3-D1 leu1-32 ura4-D18 set9::KanMX6 chk1-13myc-hphMX6 + pJR81XL-2YFP-Crb2(LEU2)</i>                                           | This Study  |
| MGF1431 | <i>h- his3-D1 leu1-32 ura4-D18 set9::KanMX6 taz1::ura4<sup>+</sup> chk1::chk1-13myc-hphMX6 + pJR81XL-2YFP-Crb2(LEU2)</i>              | This Study  |
| MGF1432 | <i>h- his3-D1 leu1-32 ura4-D18 set9::KanMX6 taz1::ura4<sup>+</sup> chk1::chk1-13myc-hphMX6 ccq1::natMX6 + pJR81XL-2YFP-Crb2(LEU2)</i> | This Study  |
| MGF1454 | <i>his3-D1 leu1-32 ura4-D18 set9::KanMX6 chk1-13myc-hphMX6 ccq1::natMX6 + pJR81XL-2YFP-Crb2(LEU2)</i>                                 | This Study  |
| TN1583  | <i>h- leu1-32 ura4-D18 ade6-M210 his3-D1 hta1-S129A-ura4<sup>+</sup> hta2-S128A-his3<sup>+</sup></i>                                  | T. Nakamura |
| TN436   | <i>h+ leu1-32 ura4-D18 ade6-M216 his3-D1 rhp51::ura4<sup>+</sup></i>                                                                  | T. Nakamura |
| TN2411  | <i>h- leu1-32 ura4-D18 his3-D1</i>                                                                                                    | T. Nakamura |
| TN3875  | <i>h- leu1-32 ura4-D18 TAP-crb2<sup>+</sup></i>                                                                                       | T. Nakamura |
| TN4422  | <i>h- leu1-32 ura4-D18 his3-D1 cut5::cut5-13myc-kanMX6</i>                                                                            | T. Nakamura |
| TN5599  | <i>h- leu1-32 ura4-D18 his3-D1 rad11::rad11-5FLAG-KanMX6</i>                                                                          | T. Nakamura |
| TN6331  | <i>h+ leu1-32 ura4-D18 his3-D1 taz1-2::ura4<sup>+</sup> rad11-5FLAG:KanMX6</i>                                                        | T. Nakamura |
| LK8667  | <i>h- leu1-32 ura4-D18 his3-D1 ccq1::hphMX6</i>                                                                                       | This Study  |
| LK8880  | <i>h- leu1-32 ura4-D18 his3-D1 taz1-2::ura4<sup>+</sup> ccq1::hphMX6</i>                                                              | This Study  |
| LK10138 | <i>h+ leu1-32 ura4-D18 ade6-M210 his3-D1 taz1-2::ura4<sup>+</sup> TAP-crb2<sup>+</sup></i>                                            | This Study  |
| LK10142 | <i>h+ leu1-32 ura4-D18 ade6-M210 his3-D1 taz1-2::ura4<sup>+</sup> cut5::cut5-13myc-kanMX6</i>                                         |             |
| LK10146 | <i>h- leu1-32 ura4-D18 ade6-M210 his3-D1 taz1-2::ura4<sup>+</sup> hta1-S129A:ura4<sup>+</sup> hta2-S128A:his3<sup>+</sup></i>         | This Study  |
| LK10152 | <i>h+ leu1-32 ura4-D18 his3-D1 taz1-2::ura4<sup>+</sup> set9::kanMX6</i>                                                              | This Study  |
| LK10177 | <i>h- leu1-32 ura4-D18 his3-D1 ccq1::hphMX set9::kanMX6</i>                                                                           | This Study  |
| LK10180 | <i>h- leu1-32 ura4-D18 his3-D1 ccq1::hphMX TAP-crb2<sup>+</sup></i>                                                                   | This Study  |
| CF213   | <i>h- leu1-32 ura4-D18 ade6-M210 his3-D1 taz1-2::ura4<sup>+</sup></i>                                                                 | T. Nakamura |
| WL5954  | <i>h- leu1-32 ura4-D18 his3-D1 arg3::HO-KanRa TAP-crb2<sup>+</sup> ars1(Mlu1)::nmt(41)-HOwt:his3<sup>+</sup></i>                      | This Study  |
| BAM4195 | <i>h- leu1-32 ura4-D18 his3-D1 clr4::kanMX6</i>                                                                                       | This Study  |
| BAM4202 | <i>h- leu1-32 ura4-D18 his3-D1 set9::kanMX6</i>                                                                                       | This Study  |

Supplementary Table 2 - DNA primers used for ChIP.

| Location                                 | Primer Name | Primer Sequence (5' to 3')         | References |
|------------------------------------------|-------------|------------------------------------|------------|
| telomere (TAS1)                          | Jk380       | TATTTCTTTATTCAACTTACCGCACTTC       | 6          |
|                                          | Jk381       | CAGTAGTGCAGTGTATTATGATAATTTAAAATGG | 6          |
| <i>ade6<sup>+</sup></i> locus            | TN633       | TGATGGAGGACGTGAGCACATTGA           | This Study |
|                                          | TN634       | TTGAATGCATCGCAGAGTTGCAGG           | This Study |
| HO site ( <i>arg3<sup>+</sup></i> locus) | TN545       | GCATACGATATATTACGGCGCAA            | This Study |
|                                          | TN546       | TTCGTACCCAATTGCCCCTATAGT           | This Study |
